# Supplementary material for: Factors Affecting the Knowledge, Attitude and Practice of Vitamin D Supplement Use among adults: A Multi-Arab countries study
Source: Research Square preprint supplement (doi:10.21203/rs.3.rs-7552460/v1), 2025-10-09
Supplement: Supplementary file 1 [file 0bd4815ffaf7f62587a874e9.docx]

# **SUPPLEMENTORY DATA**

**Table supplementary 1. Simple linear regression between Knowledge score and dichotomous variables.**

| Variable / country | Saudi Arabia | | Egypt | | Jordan | | Iraq | |
| --- | --- | --- | --- | --- | --- | --- | --- | --- |
| Beta | *p*-value | Beta | *p*-value | Beta | *p*-value | Beta | *p*-value |
| Age | -0.041 | 0.401 | 0.112 | **0.024^** | -0.062 | 0.277 | -0.073 | 0.286 |
| Living place   - *Urban - Rural | -0.061 | **0.212^** | -0.04 | 0.428 | -0.061 | 0.285 | -0.063 | 0.352 |
| Gender   - *Female - Male | 0.049 | 0.322 | -0.45 | 0.371 | -0.151 | **0.008^** | -0.104 | **0.125^** |
| Marital status   - *Married - Unmarried | -0.046 | 0.347 | 0.045 | 0.367 | -0.104 | 0.068 | 0.011 | 0.874 |
| Educational level   - *University (bachelor’s & higher education) - Non-university | -0.117 | **0.018^** | -0.099 | **0.049^** | -0.044 | 0.445 | -0.139 | **0.04^** |
| Insurance covered   - *Yes - No | -0.148 | **0.003^** | -0.203 | **<0.001^** | -0.048 | 0.396 | -0.004 | 0.957 |
| Presence of chronic diseases   - *Yes - No | -0.019 | 0.702 | 0.076 | **0.126^** | 0.064 | 0.264 | -0.061 | 0.373 |
| Work sector   - *Related to health sector - Not related to health sector | -0.167 | **<0.001^** | -0.430 | **<0.001^** | -0.289 | **<0.001^** | -0.397 | **<0.001^** |
| Monthly income level   - *Less than 300$/Month - More than 300$/month | 0.048 | 0.331 | 0.067 | **0.180^** | 0.02 | 0.732 | 0.118 | **0.084^** |
| Physical status activity   - *Not active - Active | -0.004 | 0.943 | 0.075 | **0.132^** | 0.138 | **0.015^** | 0.087 | **0.201^** |
| Smoking status   - *Smoker - Non-smoker | -0.06 | **0.224^** | 0.061 | **0.222^** | 0.066 | 0.248 | 0.087 | **0.201^** |

*Reference group

^eligible for multi-linear regression (*p*-value<0.250)

**Table supplementary 2. Simple linear regression between attitude score and dichotomous variables.**

| Variable / country | Saudi Arabia | | Egypt | | Jordan | | Iraq | |
| --- | --- | --- | --- | --- | --- | --- | --- | --- |
| Beta | *p*-value | Beta | *p*-value | Beta | *p*-value | Beta | *p*-value |
| Age | -0.149 | **0.002^** | 0.011 | 0.828 | -0.041 | 0.474 | -0.148 | **0.029^** |
| Living place   - *Urban - Rural | -0.096 | **0.052^** | -0.055 | 0.271 | -0.031 | 0.586 | 0.019 | 0.775 |
| Gender   - *Female - Male | -0.049 | 0.322 | -0.208 | <**0.001^** | -0.191 | **<0.001^** | -0.289 | **<0.001^** |
| Marital status   - *Married - Unmarried | 0.017 | 0.730 | -0.015 | 0.767 | -0.03 | 0.598 | 0.052 | 0.446 |
| Educational level   - *University (bachelor’s and higher education) - Non-university | 0.045 | 0.358 | -0.056 | 0.265 | -0.024 | 0.679 | -0.110 | **0.106^** |
| Insurance covered   - *Yes - No | 0.054 | 0.269 | -0.070 | **0.162^** | 0.01 | 0.858 | -0.012 | 0.864 |
| Presence of chronic diseases   - *Yes - No | -0.010 | 0.847 | -0.026 | 0.601 | 0.037 | 0.521 | 0.033 | 0.630 |
| Work sector   - *Related to health sector - Not related to health sector | -0.116 | **0.019^** | -0.022 | 0.661 | 0.019 | 0.735 | -0.163 | **0.016^** |
| Monthly income level   - *Less than 300$/Month - More than 300$/month | 0.038 | 0.440 | -0.071 | **0.157^** | -0.035 | 0.541 | 0.05 | 0.461 |
| Physical status activity   - *Not active - Active | -0.048 | 0.344 | -0.134 | **0.007^** | 0.016 | 0.782 | -0.012 | 0.865 |
| Smoking status   - *Smoker - Non-smoker | 0.017 | 0.736 | 0.121 | **0.016^** | 0.039 | 0.493 | 0.064 | 0.350 |

*Reference group

^eligible for multi-linear regression (*p*-value<0.250)

**Table supplementary 3. Simple linear regression between practice score and dichotomous variables.**

| Variable / country | Saudi Arabia | | Egypt | | Jordan | | Iraq | |
| --- | --- | --- | --- | --- | --- | --- | --- | --- |
| Beta | *p*-value | Beta | *p*-value | Beta | *p*-value | Beta | *p*-value |
| Age | -0.233 | **<0.001^** | -0.147 | **0.022^** | 0.016 | 0.809 | 0.039 | 0.609 |
| Living place   - *Urban - Rural | -0.03 | 0.547 | 0.068 | 0.291 | 0.019 | 0.764 | -0.027 | 0.727 |
| Gender   - *Female - Male | -0.07 | **0.164^** | -0.078 | **0.225^** | -0.239 | <**0.001^** | -0.268 | **<0.001^** |
| Marital status   - *Married - Unmarried | -0.039 | 0.437 | -0.198 | **0.002^** | 0.099 | **0.122^** | 0.102 | **0.181^** |
| Educational level   - *University (bachelor’s and higher education) - Non-university | 0.026 | 0.6 | 0.015 | 0.813 | -0.069 | 0.285 | -0.008 | 0.919 |
| Insurance covered   - *Yes - No | -0.023 | 0.634 | -0.017 | 0.793 | -0.173 | **0.007^** | -0.08 | 0.299 |
| Presence of chronic diseases   - *Yes - No | -0.03 | 0.549 | 0.076 | **0.238^** | -0.011 | 0.861 | -0.139 | **0.069^** |
| Work sector   - *Related to health sector - Not related to health sector | -0.098 | **0.05^** | -0.008 | 0.904 | 0.068 | 0.286 | -0.021 | 0.784 |
| Monthly income level   - *Less than 300$/Month - More than 300$/month | -0.006 | 0.920 | -0.089 | **0.167^** | -0.056 | 0.387 | -0.004 | 0.960 |
| Physical status activity   - *Not active - Active | 0.003 | 0.950 | 0.064 | 0.320 | 0.024 | 0.710 | -0.031 | 0.689 |
| Smoking status   - *Smoker - Non-smoker | -0.036 | 0.476 | 0.110 | **0.087^** | 0.078 | **0.226^** | 0.177 | **0.02^** |

*Reference group

^eligible for multi-linear regression (*p*-value<0.250)
